# Supplementary material
Source: publisher figshare collection journal article supplement (https://wiley.figshare.com/articles/dataset/_/3560238)
Supplement: Supplementary file 1 [file 1]

# Tropical tree diversity enhances light capture through crown plasticity and spatial and temporal niche differences

Jurgis Sapijanskas, Alain Paquette, Catherine Potvin, Norbert Kunert and Michel Loreau

## Appendix A: Experimental design of the Sardinilla plantation.

### Experimental design

The experimental plantation is located in Sardinilla, ca. 50 km north of Panama City (Panama,  
2 Central America). Mean annual rainfall at the nearest meteorological station (Buena Vista) is  
2351 mm with 25-50mm per month during the dry season (January to March) and *ca.* 250mm per  
4 month during the rainy season (May to November). Daily and seasonal temperatures are relatively  
constant ranging from a daily maximum of 34.3 C to a minimum of 21.1 C in January (STRI,  
6 2009). The elevation of the site is on average 70 m, with a slightly undulating topography. In July  
2001, 5566 seedlings of six native species were planted to establish a synthetic gradient of species  
8 richness (Scherer-Lorenzen et al., 2007).

The species planted in Sardinilla were selected based on a range of traits including functional  
10 traits, local usage and ecological importance. Species data available from the 50 ha dynamic plot  
of nearby forest of Barro Colorado Island (BCI) served as a basis for selection (Condit *et al.*, 2006).  
12 The species were chosen to cover a range of relative growth rates in diameter at breast height  
(RGR) that is representative of BCI trees (Table A1). We however excluded from the selection

species with exceedingly high growth rates such as *Cecropia insignis* or *Trema micrantha* which have observed relative growth rate on BCI of respectively 19.5% and 43.95%. For results to be directly relevant to nearby afforestation initiatives, species were further chosen either for their timber value (*Anacardium excelsium*; Ae; *Cordia alliodora*, Ca; *Cedrela odorata*, Co and *Tabebuia rosea*, Tr) or because they are abundant in the Panama Canal watershed where the experiment is taking place (*Hura crepitans*, Hc and *Luehea seemanii*, Ls; Potvin & Gotelli, 2008). In sum, three functional groups were formed *a priori* based on relative growth rates observed in BCI: Ca and Ls are the fast-growers, Ae and Hc the intermediate species and Co and Tr the relatively slow-growers (Table A1).

Both Co and Tr have been classified as shade-intolerant and non-pioneer species (Elias & Potvin, 2003; Poorter & Bongers, 2006) but are also known to tolerate shade (Condit *et al.*, 1996; Hooper *et al.*, 2002). Hc, Ae, Ca and Ls have the fastest growth rates (Table A1) and are able to colonize relatively large forest gaps (Croat, 1978). Hc is shade tolerant (Sautu, 2002). Ca and Ls are the only species that have already been considered as a pioneer species per se (Lang & Knight, 1983; Welden *et al.*, 1991; Ellis *et al.*, 2000; Hooper *et al.*, 2002; Coll *et al.*, 2008). The species selected for the plantation also encompass a range of phenology representative of the tropical moist lowland forests. Ae and Co lose their leaves in the early dry season, Hc loses them in the middle of the dry season, Ls becomes deciduous at the end of the dry season while Ca loses its leaves in the early wet season. Tr has been reported to drop its leaves from March through June Flores & Marin (2003) but also to lose its leaves twice during the year both in the early dry season (January-February) then once more in July Croat (1978). More details on each species is provided in section *Species characteristics*.

Following standard reforestation practices in Panama, seedlings were planted at 3 m distance from each other in our  $45 \times 45 \text{ m}^2$  plots. Each species was planted in two replicated monocul-

ture plots, in three 3-species-mixture plots and in six 6-species-mixture plots. Within each plot, trees were planted following a multiple Latin-square design to ensure that systematic environmental variation did not bias the results. Thus, the species identity of neighbours around trees of a given species remained the same within a plot, thereby forming a specific neighbourhood (Fig. A1). Because species composition changes over the 3-species plots while the 6-species plots are perfect replicates, trees from any given species experience, across the plantation, five different neighbourhoods: one in monoculture, three from 3-species plots and one from 6-species plots. *C. alliodora* failed to establish: of the 900 initially planted, only 51 individuals remained in 2011, all in mixtures. At year 9 after planting, there were thus 22 plots of interest: 10 monocultures (two per species), six 3-species mixtures (T1 to T6) and six 6-species mixtures (A1 to A6).

For analytical purposes and because spatial heterogeneity expressed itself at smaller scales, plots were partitioned in 4 subplots of equal size *ca.* 22.5m×22.5m) to capture heterogeneity within a plot (Healy *et al.*, 2008). Investigation are thus undertaken at the subplot scale in this study. The species identity of neighbours around trees of a given species remained the same within a subplot.

## Species characteristics

Ae has a rounded and dense crown and grows at a medium rate to 45 m in height and 3 m d.b.h (Fournier, 2003a). Ae grows in a wide range of soils and climatic conditions. Many of the trees drop their leaves for a short period of time during late November and December and green flushes of new foliage appear in early January (Allen, 1956). Ae has simple, alternative, relatively large obovate (oblong in outline with a rounded apex) leaves. Its leaves have no stipules, are 15 to 35 cm long and between 5 to 15 cm wide.

Ca is generally a tall, thin tree with a narrow, open crown (Boshier, 2003). It grows under a

wide range of ecological conditions from very wet to seasonally dry. In seasonally dry, deciduous,  
62 and semi-deciduous forest the species rarely grows more than 20 m in height and 30 cm dbh while  
it may reach 40m in height and 1 m dbh in wetter environments. Mature trees are deciduous, even  
64 in aseasonal climates, losing their leaves for 1 to 2 months per year.

66 Co is a deciduous tree that can reach 35 m in height and 60 cm dbh (Rocas, 2003). Co grows  
in areas with an annual average of temperature of 22 to 32 C, average annual precipitation of 1600  
68 to 2500 mm and a 3 to 4-month dry season. Co has a globose or rounded crown with a dense leaf  
cover. The leaves of Co are paripinnate or imparipinnate, 15 to 50 cm long, made up of 10 to 22  
70 oblong or lanceolate leaflets that are asymmetrical, 4.5 to 14 cm long and 2 to 4.5 cm wide (Rocas,  
2003).

72  
Hc can reach up to 45m in height and more than 2m in diameter (Sautu, 2002). It grows in areas  
74 with at least 1,500 mm to 2,500 mm of rainfall. Young individuals are extremely shade tolerant and  
saplings can survive up to two years completely shaded. The adult tree has a large rounded crown  
76 usually formed out of three main branches. The leaves of Hc are simple, have long petioles and a  
round base. They are ovate with cordate-shaped apex. They are 4 to 16 cm long and equal in width.

78  
Ls is a fast-growing tree that can reach more than m in height and 2m dbh (Fournier, 2003b).  
80 Ls grows on a wide range of soils and climate from 2000 mm to 4000 mm and annual average  
temperatures of 23 to 25°C. The crown of Ls is round or oval. The species is gradually shedding its  
82 leaves starting at the end of the dry season and usually remains with a low leaf cover for the first  
weeks of the wet season (Kunert *et al.*, 2010). Leaves are alternate, stipulate, simple and thick-  
84 petiolate (Fournier, 2003b). Blades are oblong, oblong-elliptic or slightly oblong-obovate, rounded

at the base, acuminate at the apex. Leaves are 7 to 40 cm long and 3 to 16 cm wide.

86

Tr is a tall, fast-growing tree reaching 25 o 30 m high and 1 m dbh (Flores & Marin, 2003).

88 The crown of Tr is wide, well stratified with a few thick branches that grow irregular and horizon-

tal. Although frequent in periodically inundated forests and soils with moderate or low drainage,

90 Tr grows in a wide range of habitat from sea level to 1200 m altitude, from 20 to 30C and an-

nual rainfall above 500 mm. Leaves are dropped March through June (Flores & Marin, 2003) but

92 Tr has also been reported to lose its leaves twice during the year both in the early dry season

(January-February) then once more in July (Croat, 1978). Tr has decussate, compound, digitale

94 leaves with a long petiole (Flores & Marin, 2003). Each leaf consists out of five leaflets that differ

in size, the center leaflet being the largest. Their shape ranges between elliptic-oblong, obovate

96 and oblong-ovate. The apex is acute or acuminate, has an entire margin, and an obtuse base. The

leaflets are between 6 and 20 cm long and between 3 and 10 cm wide. The crown of Tr is wide, well

98 stratified with a few thick branches that grow irregular and horizontal (Flores & Marin, 2003).

Table A1: Details on the selected native tree species in the Sardinilla plantation. Adapted from Delagrange *et al.* 2008.<sup>†</sup>; Relative growth rates in diameter at breast height observed in the forest of Barro Colorado Island (Scherer-Lorenzen *et al.*, 2007).

| Species                         | Family        | Distribution                                           | Economic uses                               | RGR <sup>†</sup> |
|---------------------------------|---------------|--------------------------------------------------------|---------------------------------------------|------------------|
| <i>Anacardium excelsum</i> (Ae) | Meliaceae     | On the Pacific coast<br>from Mexico to Argentina       | High timber value                           | 5.9%             |
| <i>Cordia alliodora</i> (Ca)    | Boraginaceae  | From Mexico to<br>Northern Argentina                   | furniture and housing<br>High timber value  | 7.0%             |
| <i>Cedrela odorata</i> (Co)     | Bignonaceae   | From Mexico to tropical<br>South America (Venezuela)   | furniture, ornamental<br>High timber value  | 2.3%             |
| <i>Hura crepitans</i> (Hc)      | Euphorbiaceae | From Central America to<br>northern Brazil and Bolivia | Medium timber quality<br>heavy construction | 4.9%             |
| <i>Luehea seemanii</i> (Ls)     | Anacardiaceae | From Mexico to tropical<br>South America               | Good timber value<br>furniture, Canoes      | 9.1%             |
| <i>Tabebuia rosea</i> (Tr)      | Tiliaceae     | From Mexico to Argentina                               | High timber value<br>furniture and flooring | 3.4%             |

#### Six-species planting design

|     |     |     |     |     |     |     |     |
|-----|-----|-----|-----|-----|-----|-----|-----|
| Tr  | Co  | Ca  | Ls  | Ae  | Hc  | Tr  | ... |
| Co  | Ca  | Ls  | Ae  | Hc  | Tr  | Co  | ... |
| Ca  | Ls  | Ae  | Hc  | Tr  | Co  | Ca  | ... |
| Ls  | Ae  | Hc  | Tr  | Co  | Ca  | Ls  | ... |
| Ae  | Hc  | Tr  | Co  | Ca  | Ls  | Ae  | ... |
| Hc  | Tr  | Co  | Ca  | Ls  | Ae  | Hc  | ... |
| Tr  | Co  | Ca  | Ls  | Ae  | Hc  | Tr  | ... |
| ... | ... | ... | ... | ... | ... | ... | ... |

#### Three-species planting design

|     |     |     |     |     |
|-----|-----|-----|-----|-----|
| Hc  | Ca  | Co  | Hc  | ... |
| Ca  | Co  | Hc  | Ca  | ... |
| Co  | Hc  | Ca  | Co  | ... |
| ... | ... | ... | ... | ... |

|     |     |     |     |     |
|-----|-----|-----|-----|-----|
| Tr  | Ae  | Ls  | Tr  | ... |
| Ae  | Ls  | Tr  | Ae  | ... |
| Ls  | Tr  | Ae  | Ls  | ... |
| ... | ... | ... | ... | ... |

|     |     |     |     |     |
|-----|-----|-----|-----|-----|
| Ls  | Ae  | Co  | Ls  | ... |
| Ae  | Co  | Ls  | Ae  | ... |
| Co  | Ls  | Ae  | Co  | ... |
| ... | ... | ... | ... | ... |

  

|     |     |     |     |     |
|-----|-----|-----|-----|-----|
| Ls  | Hc  | Co  | Ls  | ... |
| Hc  | Co  | Ls  | Hc  | ... |
| Co  | Ls  | Hc  | Co  | ... |
| ... | ... | ... | ... | ... |

|     |     |     |     |     |
|-----|-----|-----|-----|-----|
| Tr  | Ca  | Hc  | Tr  | ... |
| Ca  | Hc  | Tr  | Ca  | ... |
| Hc  | Tr  | Ca  | Hc  | ... |
| ... | ... | ... | ... | ... |

|     |     |     |     |     |
|-----|-----|-----|-----|-----|
| Tr  | Ae  | Ca  | Tr  | ... |
| Ae  | Ca  | Tr  | Ae  | ... |
| Ca  | Tr  | Ae  | Ca  | ... |
| ... | ... | ... | ... | ... |

Figure A1: Planting design in mixture plots. The composition of the six 3-species plots was defined by randomly choosing between Ca and Ls, Ae and Hc, and Co and Tr. These three groups of species cover the range of relative growth rates in diameter at breast height in the nearby forest of Barro Colorado Island from 2.3% (Co) to 9.1% (Ls) per year. Consequently, while species composition differed among the 3-species plots and subplots, faster and slower growing species were equally represented in any given plot or subplot.

## Literature cited

Allen, P. (1956). *The rain forests of the Golfo Dulce*. U. Florida Press, Gainesville.

Boshier, D.H. (2003). *Cordia alliodora (Ruiz & Pav.) Oken*, United States Department of Agriculture, Forest Service, Wasington DC, vol. 721 of *Agriculture Handbook*, chap. Tropical tree seed manual. Part II - Species descriptions, pp. 411–413.

Coll, L., Potvin, C., Messier, C. & Delagrange, S. (2008). Root architecture and allocation patterns of eight native tropical species with different successional status used in open-grown mixed plantations in panama. *Trees*, 22, 585–596.

Condit, R., Ashton, P., Bunyavejchewin, S., Dattaraja, H.S., Davies, S., Esufali, S., Ewango, C., Foster, R., Gunatilleke, I.A.U.N., Gunatilleke, C.V.S., Hall, P., Harms, K.E., Hart, T., Hernandez, C., Hubbell, S., Itoh, A., Kiratiprayoon, S., LaFrankie, J., de Lao, S.L., Makana, J.R., Noor, M.N.S., Kassim, A.R., Russo, S., Sukumar, R., Samper, C., Suresh, H.S., Tan, S., Thomas, S., Valencia, R., Vallejo, M., Villa, G. & Zillio, T. (2006). The importance of demographic niches to tree diversity. *Science*, 313, 98–101.

Condit, R., Hubbell, S. & Foster, R. (1996). Assessing the response of plant functional types to climatic change in tropical forest. *Journal of Vegetation Science*, 7, 405–416.

Croat, T. (1978). *Flora of Barro Colorado Island*. Stanford University, Stanford.

Delagrange, S., Potvin, C., Messier, C. & Coll, L. (2008). Linking multiple-level tree traits with biomass accumulation in native tree species used for reforestation in panama. *Trees-Structure and Function*, 22, 337–349.

Elias, M. & Potvin, C. (2003). Assessing inter- and intra-specific variation in trunk carbon concentration for 32 neotropical tree species. *Canadian Journal of Forest Resarch*, 33, 1039–1045.



- Ellis, A., Hubbell, S. & Potvin, C. (2000). In situ field measurements of photosynthetic rates of tropical tree species: a test of the functional group hypothesis. *Canadian Journal of Botany-Revue Canadienne De Botanique*, 78, 1336–1347.
- Flores, E.M. & Marin, W.A. (2003). *Tabebuia rosea* (Bertol.) DC, United States Department of Agriculture, Forest Service, Wasington DC, vol. 721 of *Agriculture Handbook*, chap. Tropical tree seed manual. Part II - Species descriptions, pp. 737 – 739.
- Fournier, L.A. (2003a). *Anacardium excelsum* (Bertero & Balb. ex Kunth) Skeels, United States Department of Agriculture, Forest Service, Wasington DC, vol. 721 of *Agriculture Handbook*, chap. Tropical tree seed manual. Part II - Species descriptions, pp. 294 – 296.
- Fournier, L.A. (2003b). *Luehea seemannii* Triana & Planch, United States Department of Agriculture, Forest Service, Wasington DC, vol. 721 of *Agriculture Handbook*, chap. Tropical tree seed manual. Part II - Species descriptions, pp. 553 – 554.
- Healy, C., Gotelli, N.J. & Potvin, C. (2008). Partitioning the effects of biodiversity and environmental heterogeneity for productivity and mortality in a tropical tree plantation. *Journal of Ecology*, 96, 903–913.
- Hooper, E., Condit, R. & Legendre, P. (2002). Responses of 20 native tree species to reforestation strategies for abandoned farmland in panama. *Ecological Applications*, 12, 1626–1641.
- Kunert, N., Schwendenmann, L. & Holscher, D. (2010). Seasonal dynamics of tree sap flux and water use in nine species in panamanian forest plantations. *Agricultural and Forest Meteorology*, 150, 411–419.
- Lang, G.E. & Knight, D.H. (1983). Tree growth, mortality, recruitment, and canopy gap formation during a 10-year period in a tropical moist forest. *Ecology*, 64, pp. 1075–1080.

- 144 Poorter, L. & Bongers, F. (2006). Leaf traits are good predictors of plant performance across 53  
rain forest species. *Ecology*, 87, 1733–1743.
- 146 Potvin, C. & Gotelli, N.J. (2008). Biodiversity enhances individual performance but does not affect  
survivorship in tropical trees. *Ecology Letters*, 11, 217–223.
- 148 Rocas, A.N. (2003). *Cedrela odorata* L., United States Department of Agriculture, Forest Service,  
Washington DC, vol. 721 of *Agriculture Handbook*, chap. Tropical tree seed manual. Part II -  
150 Species descriptions, pp. 386–388.
- Sautu, A. (2002). Tronador hura crepitans l. familia euphorbiaceae. cultivos de arboles nativos de  
152 panama. Tech. rep., STRI.
- Scherer-Lorenzen, M., Bonilla, J.L. & Potvin, C. (2007). Tree species richness affects litter produc-  
154 tion and decomposition rates in a tropical biodiversity experiment. *Oikos*, 116, 2108–2124.
- STRI (2009). Temperature and rainfall data barro colorado island, panama 1987–2007.
- 156 Welden, C., Hewett, S., Hubbell, S. & Foster, R. (1991). Sapling survival, growth, and recruitment:  
relationship to canopy height in a neotropical forest. *Ecology*, 72, 35–50.
